# Supplementary material for: Pb2Ga3F6(SeO3)2X3·2H2O (X = Cl, Br): two new HTO-type members exhibiting large NLO effects mediated by ionic mixing and substitution strategies
Source: Royal Society of Chemistry journal article supplement (doi:10.1039/d4tc00554f), 2024-01-01

## Supporting Information

### **Pb<sub>2</sub>Ga<sub>3</sub>F<sub>6</sub>(SeO<sub>3</sub>)<sub>2</sub>X<sub>3</sub>·2H<sub>2</sub>O (X=Cl, Br): Two New HTO-Type Members Exhibiting Large NLO Effect Mediated by Ionic Mixing and Substitution Strategy**

Lili Liu,<sup>a\*</sup> Junbo Wang,<sup>a</sup> Bingchen Xiao,<sup>a</sup> Xunchi Li,<sup>a</sup> Yaoqing Chu,<sup>a</sup> Tongqing Sun,<sup>b\*</sup> P. Shiv Halasyamani<sup>c</sup>

## Table of Contents

|                                                                                                                                                                                                                                                                             |            |
|-----------------------------------------------------------------------------------------------------------------------------------------------------------------------------------------------------------------------------------------------------------------------------|------------|
| <b>Table S1.</b> HTO-type selenite.                                                                                                                                                                                                                                         | <b>S3</b>  |
| <b>Tables S2.</b> Atomic coordinates, displacement parameters and BVS.                                                                                                                                                                                                      | <b>S4</b>  |
| <b>Tables S3.</b> Selected bond lengths and angles.                                                                                                                                                                                                                         | <b>S5</b>  |
| <b>Figures S1.</b> Experimental and calculated powder XRD patterns.                                                                                                                                                                                                         | <b>S7</b>  |
| <b>Figure S2.</b> Crystal structure of $\text{Pb}_2\text{GaF}_2(\text{SeO}_3)_2\text{Br}$                                                                                                                                                                                   | <b>S7</b>  |
| <b>Figure S3.</b> Coordination environments of cations in $\text{Pb}_2\text{GaF}_2(\text{SeO}_3)_2\text{Br}$                                                                                                                                                                | <b>S8</b>  |
| <b>Figure S4.</b> The IR spectra.                                                                                                                                                                                                                                           | <b>S8</b>  |
| <b>Figure S5.</b> The TG curves.                                                                                                                                                                                                                                            | <b>S9</b>  |
| <b>Figure S6.</b> The band structure of (a) $\text{Pb}_2\text{Ga}_3\text{F}_6(\text{SeO}_3)_2\text{Cl}_3 \cdot 2\text{H}_2\text{O}$ and (b) $\text{Pb}_2\text{Ga}_3\text{F}_6(\text{SeO}_3)_2\text{Br}_3 \cdot 2\text{H}_2\text{O}$ .                                       | <b>S9</b>  |
| <b>Figure S7.</b> The calculated refractive index and birefringence curves of (a) $\text{Pb}_2\text{Ga}_3\text{F}_6(\text{SeO}_3)_2\text{Cl}_3 \cdot 2\text{H}_2\text{O}$ and (b) $\text{Pb}_2\text{Ga}_3\text{F}_6(\text{SeO}_3)_2\text{Br}_3 \cdot 2\text{H}_2\text{O}$ . | <b>S10</b> |

Table S1. HTO-type selenite.

|    | Molecule                                                             | Space group            | SHG effect<br>×KDP | Band gap<br>(eV) | Phase matchability |
|----|----------------------------------------------------------------------|------------------------|--------------------|------------------|--------------------|
| 1  | $\text{NH}_4(\text{VO}_2)_3(\text{SeO}_3)_2$                         | $\text{P6}_3$          | 1.0                | N/A              | NPM                |
| 2  | $\text{K}(\text{VO}_2)_3(\text{SeO}_3)_2$                            | $\text{P6}_3$          | 1.1                | 2.43             | NPM                |
| 3  | $\text{Rb}(\text{VO}_2)_3(\text{SeO}_3)_2$                           | $\text{P6}_3$          | 1.0                | 2.39             | NPM                |
| 4  | $\text{Cs}(\text{VO}_2)_3(\text{SeO}_3)_2$                           | $\text{P6}_3$          | 1.0                | 2.4              | NPM                |
| 5  | $\text{Tl}(\text{VO}_2)_3(\text{SeO}_3)_2$                           | $\text{P6}_3$          | 1.2                | 2.44             | NPM                |
| 6  | $(\text{NH}_4)_2(\text{MoO}_3)_3\text{SeO}_3$                        | $\text{P6}_3$          | 10.0               | N/A              | NPM                |
| 7  | $\text{Rb}_2(\text{MoO}_3)_3\text{SeO}_3$                            | $\text{P6}_3$          | 7.5                | 3.2              | NPM                |
| 8  | $\text{Cs}_2(\text{MoO}_3)_3\text{SeO}_3$                            | $\text{P6}_3$          | 8.7                | 3.1              | NPM                |
| 9  | $\text{Tl}_2(\text{MoO}_3)_3\text{SeO}_3$                            | $\text{P31c}$          | 10.0               | 3.0              | NPM                |
| 10 | $\text{Na}_2(\text{WO}_3)_3(\text{SeO}_3) \cdot 2\text{H}_2\text{O}$ | $\text{P31c}$          | 11.2               | 3.2              | NPM                |
| 11 | $\text{Na}_6(\text{W}_6\text{O}_{19})(\text{SeO}_3)_2$               | $\text{C2}$            | 0.5                | 2.9              | NPM                |
| 12 | $(\text{NH}_4)_2(\text{WO}_3)_3\text{SeO}_3$                         | $\text{P6}_3$          | 5.0                | N/A              | PM                 |
| 13 | $\text{Rb}_2(\text{WO}_3)_3\text{SeO}_3$                             | $\text{P6}_3$          | N/A                | 3.2              | N/A                |
| 14 | $\text{Cs}_2(\text{WO}_3)_3\text{SeO}_3$                             | $\text{P6}_3$          | 5.0                | 3.2              | PM                 |
| 15 | $\text{K}_2(\text{WO}_3)_3\text{SeO}_3$                              | $\text{P6}_3$          | N/A                | 3.1              | N/A                |
| 16 | $\text{Tl}_2(\text{WO}_3)_3\text{SeO}_3$                             | Unstable               | N/A                | 2.0              | N/A                |
| 17 | $\text{Cs}(\text{TiOF})_3(\text{SeO}_3)_2$                           | $\text{P6}_3\text{mc}$ | 5.0                | 3.5              | PM                 |
| 18 | $\text{RbGa}_3\text{F}_6(\text{SeO}_3)_2$                            | $\text{P6}_3\text{mc}$ | 5.6                | 3.57             | PM                 |
| 19 | $\text{CsGa}_3\text{F}_6(\text{SeO}_3)_2$                            | $\text{P6}_3\text{mc}$ | 5.4                | 3.65             | PM                 |
| 20 | $\text{K}(\text{GaF}_2)_3(\text{SeO}_3)_2$                           | $\text{R-3m}$          | -                  | 5.62             | -                  |
| 21 | $\text{NH}_4(\text{GaF}_2)_3(\text{SeO}_3)_2$                        | $\text{P6}_3\text{mc}$ | 1.1                | 5.77             | PM                 |

N/A: not available

Table S2. Atomic coordinates ( $\times 10^4$ ), equivalent isotropic displacement parameters ( $\text{\AA}^2 \times 10^3$ ) and BVS for  $\text{Pb}_2\text{Ga}_3\text{F}_6(\text{SeO}_3)_2\text{Br}_3 \cdot 2\text{H}_2\text{O}$  and  $\text{Pb}_2\text{Ga}_3\text{F}_6(\text{SeO}_3)_2\text{Br}_3 \cdot 2\text{H}_2\text{O}$ .  $U(\text{eq})$  is defined as one third of the trace of the orthogonalized  $U_{ij}$  tensor.

| $\text{Pb}_2\text{Ga}_3\text{F}_6(\text{SeO}_3)_2\text{Cl}_3 \cdot 2\text{H}_2\text{O}$ |          |          |         |                |      |
|-----------------------------------------------------------------------------------------|----------|----------|---------|----------------|------|
|                                                                                         | x        | y        | z       | $U(\text{eq})$ | BVS  |
| Pb(1)                                                                                   | 3333     | 6667     | 4386(1) | 19(1)          | 2.14 |
| Cl(1)                                                                                   | 4057(8)  | 4057(8)  | 5000    | 39(1)          | 0.99 |
| Se(1)                                                                                   | 10000    | 10000    | 5742(1) | 7(1)           | 4.12 |
| Ga(1)                                                                                   | 8278(4)  | 6667     | 6667    | 7(1)           | 2.74 |
| F(1)                                                                                    | 5380(15) | 4547(16) | 6488(2) | 19(1)          | 0.93 |
| O(1)                                                                                    | 8610(16) | 7561(10) | 6001(2) | 12(1)          | 1.91 |
| O(2)                                                                                    | 3333     | 6667     | 6051(4) | 30(3)          | 1.78 |
| H2(A)                                                                                   | 3460     | 5960     | 5785    | 45             | 0.92 |
| H2(B)                                                                                   | 2655     | 5521     | 6272    | 45             | 0.86 |
| $\text{Pb}_2\text{Ga}_3\text{F}_6(\text{SeO}_3)_2\text{Br}_3 \cdot 2\text{H}_2\text{O}$ |          |          |         |                |      |
|                                                                                         | x        | y        | z       | $U(\text{eq})$ | BVS  |
| Pb(1)                                                                                   | 6667     | 3333     | 5638(1) | 22(1)          | 2.24 |
| Br(1)                                                                                   | 6160(2)  | 6160(2)  | 5000    | 42(1)          | 1.06 |
| Se(1)                                                                                   | 0        | 0        | 4230(1) | 9(1)           | 3.99 |
| Ga(1)                                                                                   | 1721(2)  | 3333     | 3333    | 9(1)           | 2.73 |
| F(1)                                                                                    | 4629(9)  | 5448(9)  | 3508(1) | 22(1)          | 0.90 |
| O(1)                                                                                    | 1373(10) | 2451(6)  | 3977(1) | 14(1)          | 1.88 |
| O(2)                                                                                    | 6667     | 3333     | 3935(3) | 34(2)          | 1.69 |
| H(2A)                                                                                   | 6540     | 4040     | 4202    | 51             | 0.86 |
| H(2B)                                                                                   | 7345     | 4479     | 3714    | 51             | 0.83 |

Table S3. Bond lengths [Å] and angles [deg] for  $\text{Pb}_2\text{Ga}_3\text{F}_6(\text{SeO}_3)_2\text{Cl}_3 \cdot 2\text{H}_2\text{O}$  and  $\text{Pb}_2\text{Ga}_3\text{F}_6(\text{SeO}_3)_2\text{Br}_3 \cdot 2\text{H}_2\text{O}$ .

| $\text{Pb}_2\text{Ga}_3\text{F}_6(\text{SeO}_3)_2\text{Cl}_3 \cdot 2\text{H}_2\text{O}$ |            |                     |          |
|-----------------------------------------------------------------------------------------|------------|---------------------|----------|
| Pb(1)-O(1)                                                                              | 2.860(7)   | O(1)#4-Se(1)-O(1)   | 102.7(2) |
| Pb(1)-Cl(1)#1                                                                           | 2.7922(14) | O(1)#5-Se(1)-O(1)   | 102.7(2) |
| Pb(1)-Cl(1)#2                                                                           | 2.7922(14) | F(1)#6-Ga(1)-F(1)   | 93.8(4)  |
| Pb(1)-Cl(1)                                                                             | 2.7922(14) | F(1)#6-Ga(1)-F(1)#7 | 88.2(3)  |
| Se(1)-O(1)#4                                                                            | 1.694(6)   | F(1)-Ga(1)-F(1)#7   | 177.9(2) |
| Se(1)-O(1)#5                                                                            | 1.694(6)   | F(1)#6-Ga(1)-F(1)#8 | 177.9(2) |
| Se(1)-O(1)                                                                              | 1.694(6)   | F(1)-Ga(1)-F(1)#8   | 88.2(3)  |
| Ga(1)-F(1)#6                                                                            | 1.940(10)  | F(1)#7-Ga(1)-F(1)#8 | 89.8(3)  |
| Ga(1)-F(1)                                                                              | 1.940(11)  | F(1)#6-Ga(1)-O(1)#6 | 85.2(3)  |
| Ga(1)-F(1)#7                                                                            | 1.946(11)  | F(1)-Ga(1)-O(1)#6   | 91.4(3)  |
| Ga(1)-F(1)#8                                                                            | 1.946(11)  | F(1)#7-Ga(1)-O(1)#6 | 88.2(4)  |
| Ga(1)-O(1)#6                                                                            | 1.963(6)   | F(1)#8-Ga(1)-O(1)#6 | 95.2(3)  |
| Ga(1)-O(1)                                                                              | 1.963(6)   | F(1)#6-Ga(1)-O(1)   | 91.4(3)  |
| Cl(1)#1-Pb(1)-Cl(1)#2                                                                   | 85.55(3)   | F(1)-Ga(1)-O(1)     | 85.2(4)  |
| Cl(1)#1-Pb(1)-Cl(1)                                                                     | 85.55(3)   | F(1)#7-Ga(1)-O(1)   | 95.2(3)  |
| Cl(1)#2-Pb(1)-Cl(1)                                                                     | 85.55(3)   | F(1)#8-Ga(1)-O(1)   | 88.2(3)  |
| O(1)#4-Se(1)-O(1)#5                                                                     | 102.7(2)   | O(1)#6-Ga(1)-O(1)   | 175.1(7) |
| Symmetry transformations used to generate equivalent atoms:                             |            |                     |          |
| #1 -y+1,x-y+1,z    #2 -x+y,-x+1,z    #3 y,x,-z+1                                        |            |                     |          |
| #4 -x+y+1,-x+2,z    #5 -y+2,x-y+1,z    #6 x-y+2/3,-y+4/3,-z+4/3                         |            |                     |          |
| #7 y+2/3,x+1/3,-z+4/3    #8 -x+y+1,-x+1,z    #9 -y+1,x-y,z                              |            |                     |          |

| $\text{Pb}_2\text{Ga}_3\text{F}_6(\text{SeO}_3)_2\text{Br}_3 \cdot 2\text{H}_2\text{O}$ |          |                   |            |
|-----------------------------------------------------------------------------------------|----------|-------------------|------------|
| Pb(1)-O(1)                                                                              | 2.870(4) | O(1)-Se(1)-O(1)#5 | 102.74(17) |

|                                                             |            |                     |            |
|-------------------------------------------------------------|------------|---------------------|------------|
| Pb(1)-Br(1)#1                                               | 2.9153(6)  | O(1)#4-Se(1)-O(1)#5 | 102.74(17) |
| Pb(1)-Br(1)#2                                               | 2.9153(6)  | F(1)-Ga(1)-F(1)#6   | 93.3(2)    |
| Pb(1)-Br(1)                                                 | 2.9153(5)  | F(1)-Ga(1)-O(1)#6   | 91.9(2)    |
| Se(1)-O(1)                                                  | 1.706(4)   | F(1)#6-Ga(1)-O(1)#6 | 85.3(2)    |
| Se(1)-O(1)#4                                                | 1.706(4)   | F(1)-Ga(1)-O(1)     | 85.3(2)    |
| Se(1)-O(1)#5                                                | 1.706(4)   | F(1)#6-Ga(1)-O(1)   | 91.9(2)    |
| Ga(1)-F(1)                                                  | 1.950(7)   | O(1)#6-Ga(1)-O(1)   | 176.0(4)   |
| Ga(1)-F(1)#6                                                | 1.950(6)   | F(1)-Ga(1)-F(1)#7   | 88.7(2)    |
| Ga(1)-O(1)#6                                                | 1.951(4)   | F(1)#6-Ga(1)-F(1)#7 | 177.95(11) |
| Ga(1)-O(1)                                                  | 1.951(4)   | O(1)#6-Ga(1)-F(1)#7 | 95.1(2)    |
| Ga(1)-F(1)#7                                                | 1.953(6)   | O(1)-Ga(1)-F(1)#7   | 87.7(2)    |
| Ga(1)-F(1)#8                                                | 1.953(6)   | F(1)-Ga(1)-F(1)#8   | 177.95(11) |
| Br(1)#1-Pb(1)-Br(1)#2                                       | 83.862(16) | F(1)#6-Ga(1)-F(1)#8 | 88.7(2)    |
| Br(1)#1-Pb(1)-Br(1)                                         | 83.862(16) | O(1)#6-Ga(1)-F(1)#8 | 87.7(2)    |
| Br(1)#2-Pb(1)-Br(1)                                         | 83.862(16) | O(1)-Ga(1)-F(1)#8   | 95.1(2)    |
| O(1)-Se(1)-O(1)#4                                           | 102.74(17) | F(1)#7-Ga(1)-F(1)#8 | 89.4(2)    |
| Symmetry transformations used to generate equivalent atoms: |            |                     |            |
| #1 -y+1,x-y,z    #2 -x+y+1,-x+1,z    #3 y,x,-z+1            |            |                     |            |
| #4 -y,x-y,z    #5 -x+y,-x,z    #6 x-y+1/3,-y+2/3,-z+2/3     |            |                     |            |
| #7 -x+y,-x+1,z    #8 y-2/3,x-1/3,-z+2/3    #9 -y+1,x-y+1,z  |            |                     |            |

Figure S1. Calculated and experimental powder XRD patterns for  $\text{Pb}_2\text{Ga}_3\text{F}_6(\text{SeO}_3)_2\text{Cl}_3 \cdot 2\text{H}_2\text{O}$  (a) and  $\text{Pb}_2\text{Ga}_3\text{F}_6(\text{SeO}_3)_2\text{Br}_3 \cdot 2\text{H}_2\text{O}$  (b).

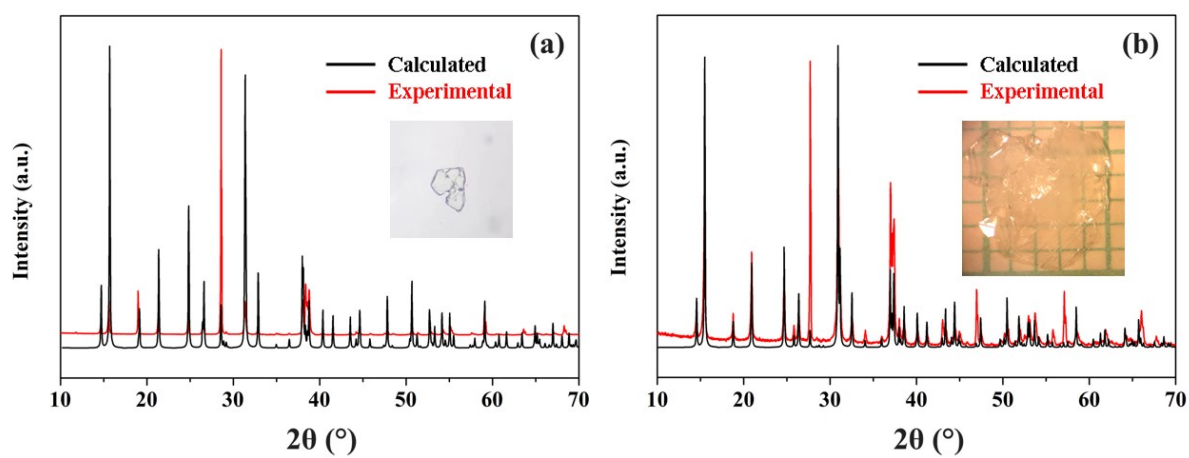

Figure S2. Unit cell of  $\text{Pb}_2\text{Ga}_3\text{F}_6(\text{SeO}_3)_2\text{Br}_3 \cdot 2\text{H}_2\text{O}$

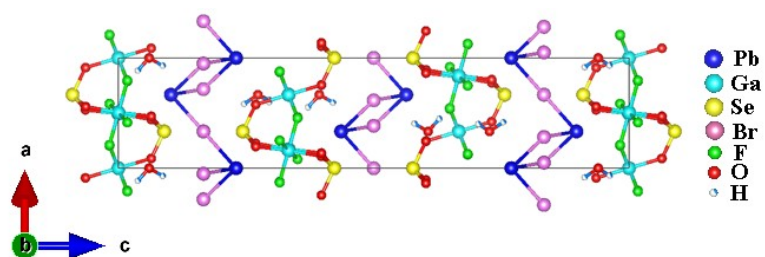

Figure S3. Coordination environments of cations in  $\text{Pb}_2\text{Ga}_3\text{F}_6(\text{SeO}_3)_2\text{Br}_3 \cdot 2\text{H}_2\text{O}$ .

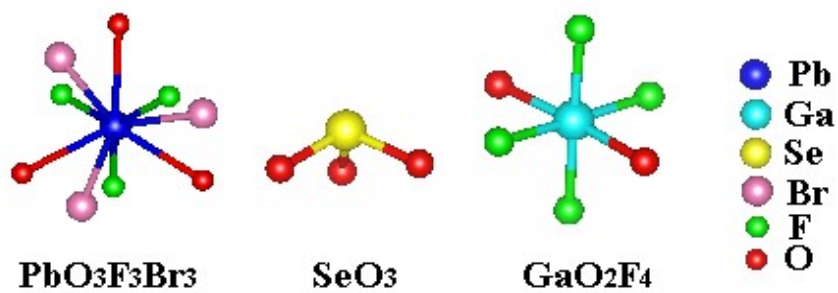

Figure S4. IR spectra of (a)  $\text{Pb}_2\text{Ga}_3\text{F}_6(\text{SeO}_3)_2\text{Cl}_3 \cdot 2\text{H}_2\text{O}$  and (b)  $\text{Pb}_2\text{Ga}_3\text{F}_6(\text{SeO}_3)_2\text{Br}_3 \cdot 2\text{H}_2\text{O}$ .

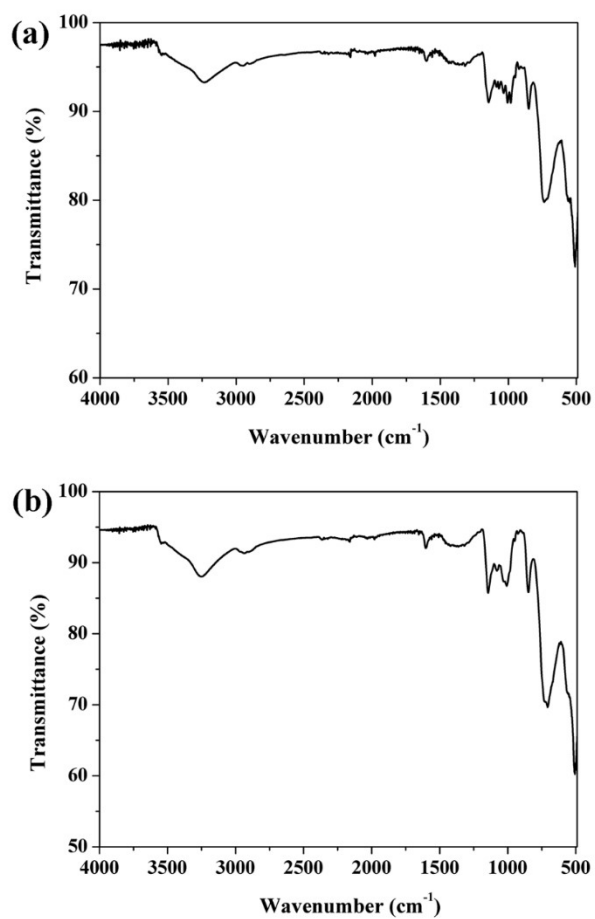



Figure S5. The TG curves of (a)  $\text{Pb}_2\text{Ga}_3\text{F}_6(\text{SeO}_3)_2\text{Cl}_3 \cdot 2\text{H}_2\text{O}$  and (b)  $\text{Pb}_2\text{Ga}_3\text{F}_6(\text{SeO}_3)_2\text{Br}_3 \cdot 2\text{H}_2\text{O}$ .

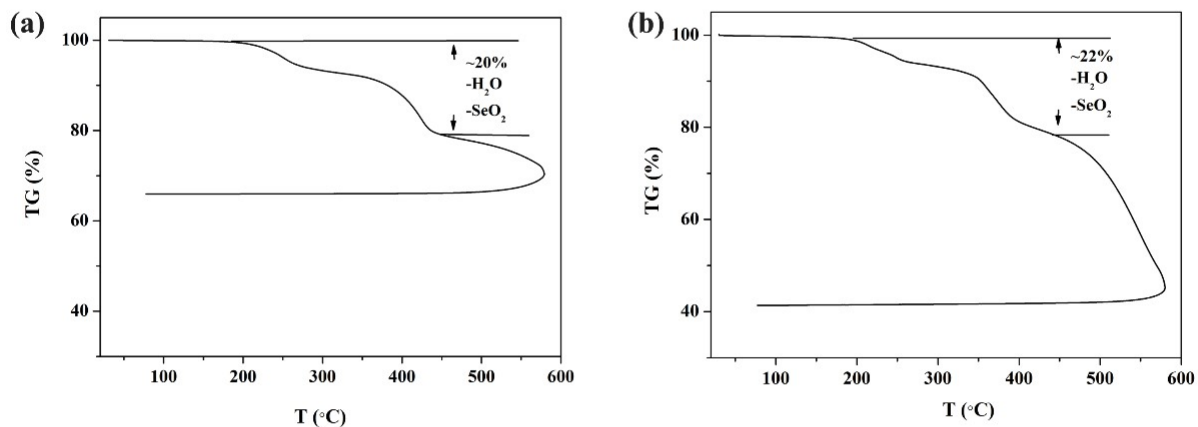

Figure S6. The band structure of (a)  $\text{Pb}_2\text{Ga}_3\text{F}_6(\text{SeO}_3)_2\text{Cl}_3 \cdot 2\text{H}_2\text{O}$  and (b)  $\text{Pb}_2\text{Ga}_3\text{F}_6(\text{SeO}_3)_2\text{Br}_3 \cdot 2\text{H}_2\text{O}$ .

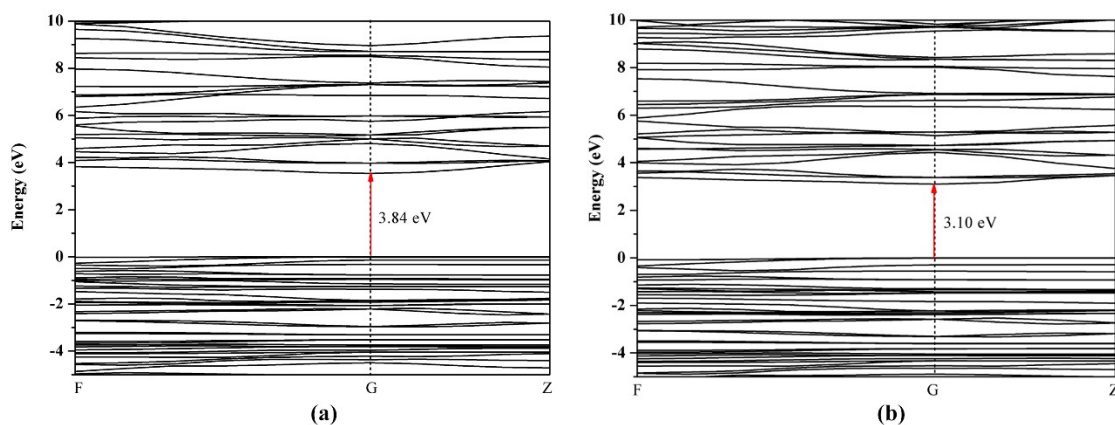

Figure S7 The calculated refractive index and birefringence curves of (a)  $\text{Pb}_2\text{Ga}_3\text{F}_6(\text{SeO}_3)_2\text{Cl}_3 \cdot 2\text{H}_2\text{O}$  and (b)  $\text{Pb}_2\text{Ga}_3\text{F}_6(\text{SeO}_3)_2\text{Br}_3 \cdot 2\text{H}_2\text{O}$ .

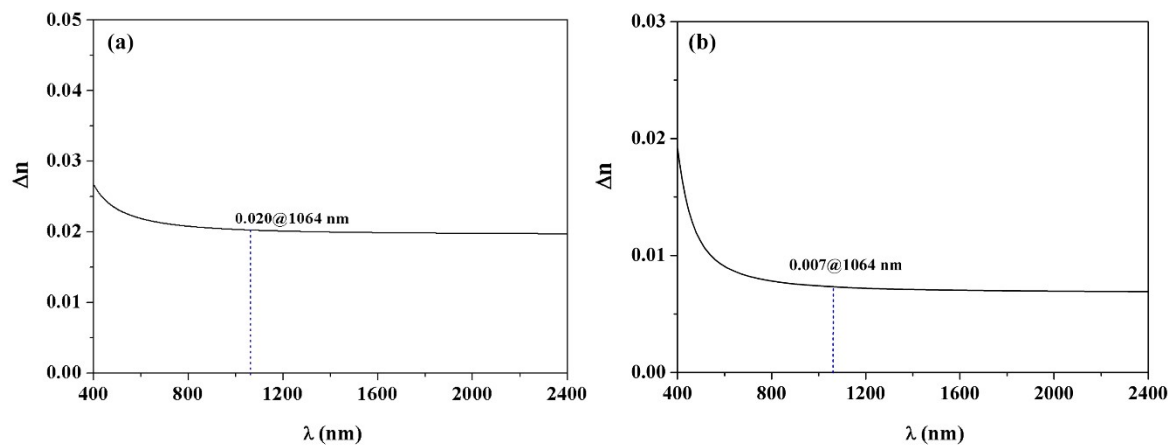

Supplement: d4tc00554f1.pdf [file d4tc00554f1.pdf]
